# Supplementary material
Source: PubMed Central journal article supplement (PMC3811574)
Supplement: EC.00084-13_zek999094160so1.pdf [file EC.00084-13_zek999094160so1.pdf]

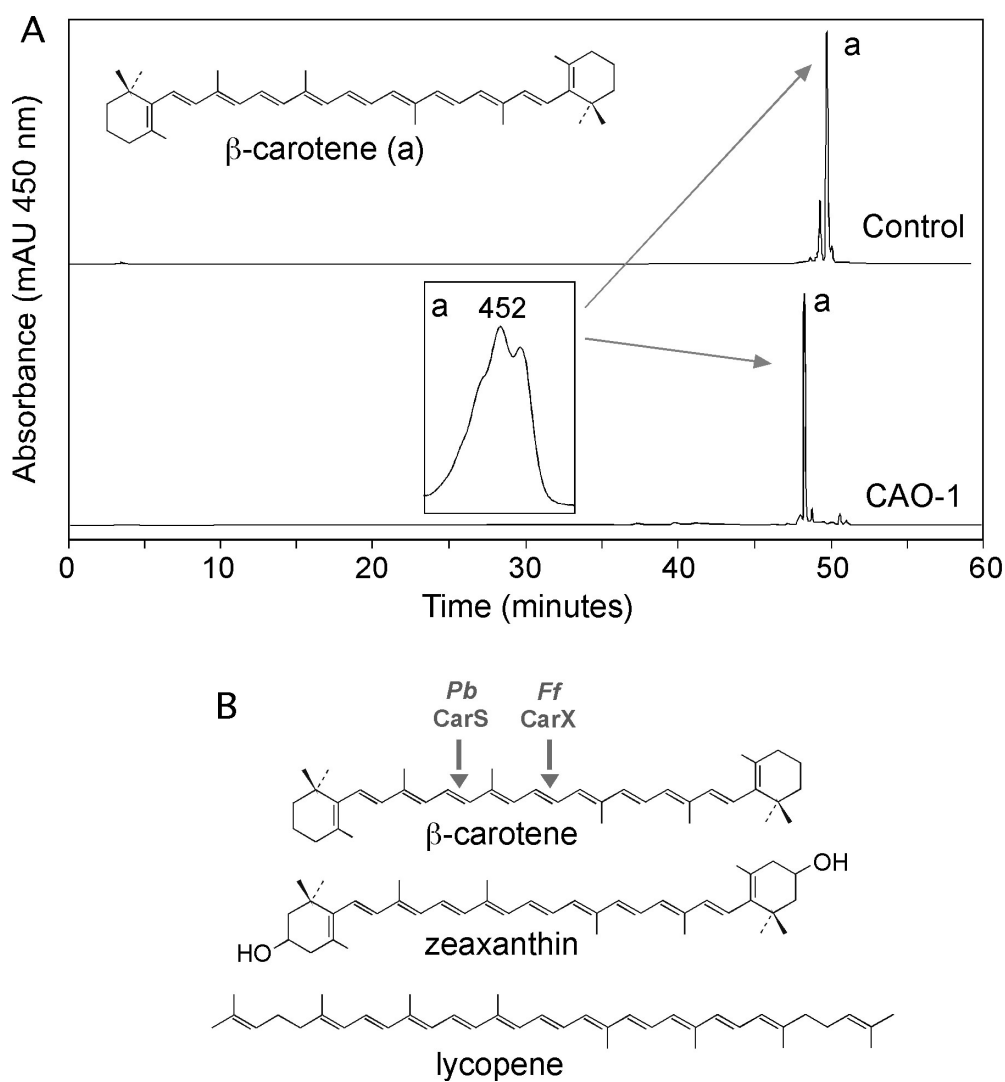

**FIG S1** Lack of activity of CAO-1 with carotenoids. (A) *In vivo* assay of CAO-1 activity on  $\beta$ -carotene. *cao-1* cDNA was expressed in  $\beta$ -carotene-accumulating *E. coli* cells under the control of an arabinose-inducible promoter. The HPLC analysis reveals the same amount of  $\beta$ -carotene irrespective of *cao-1* expression and the absence of any degradation product. The same results were obtained upon expression in *E. coli* cells producing zeaxanthin or lycopene. (B) Carotenoids assayed *in vivo* for which no cleaving activity could be detected. Cleavage sites of *P. blakesleeanus* CarS and *F. fujikuroi* CarX on  $\beta$ -carotene are indicated by arrows.

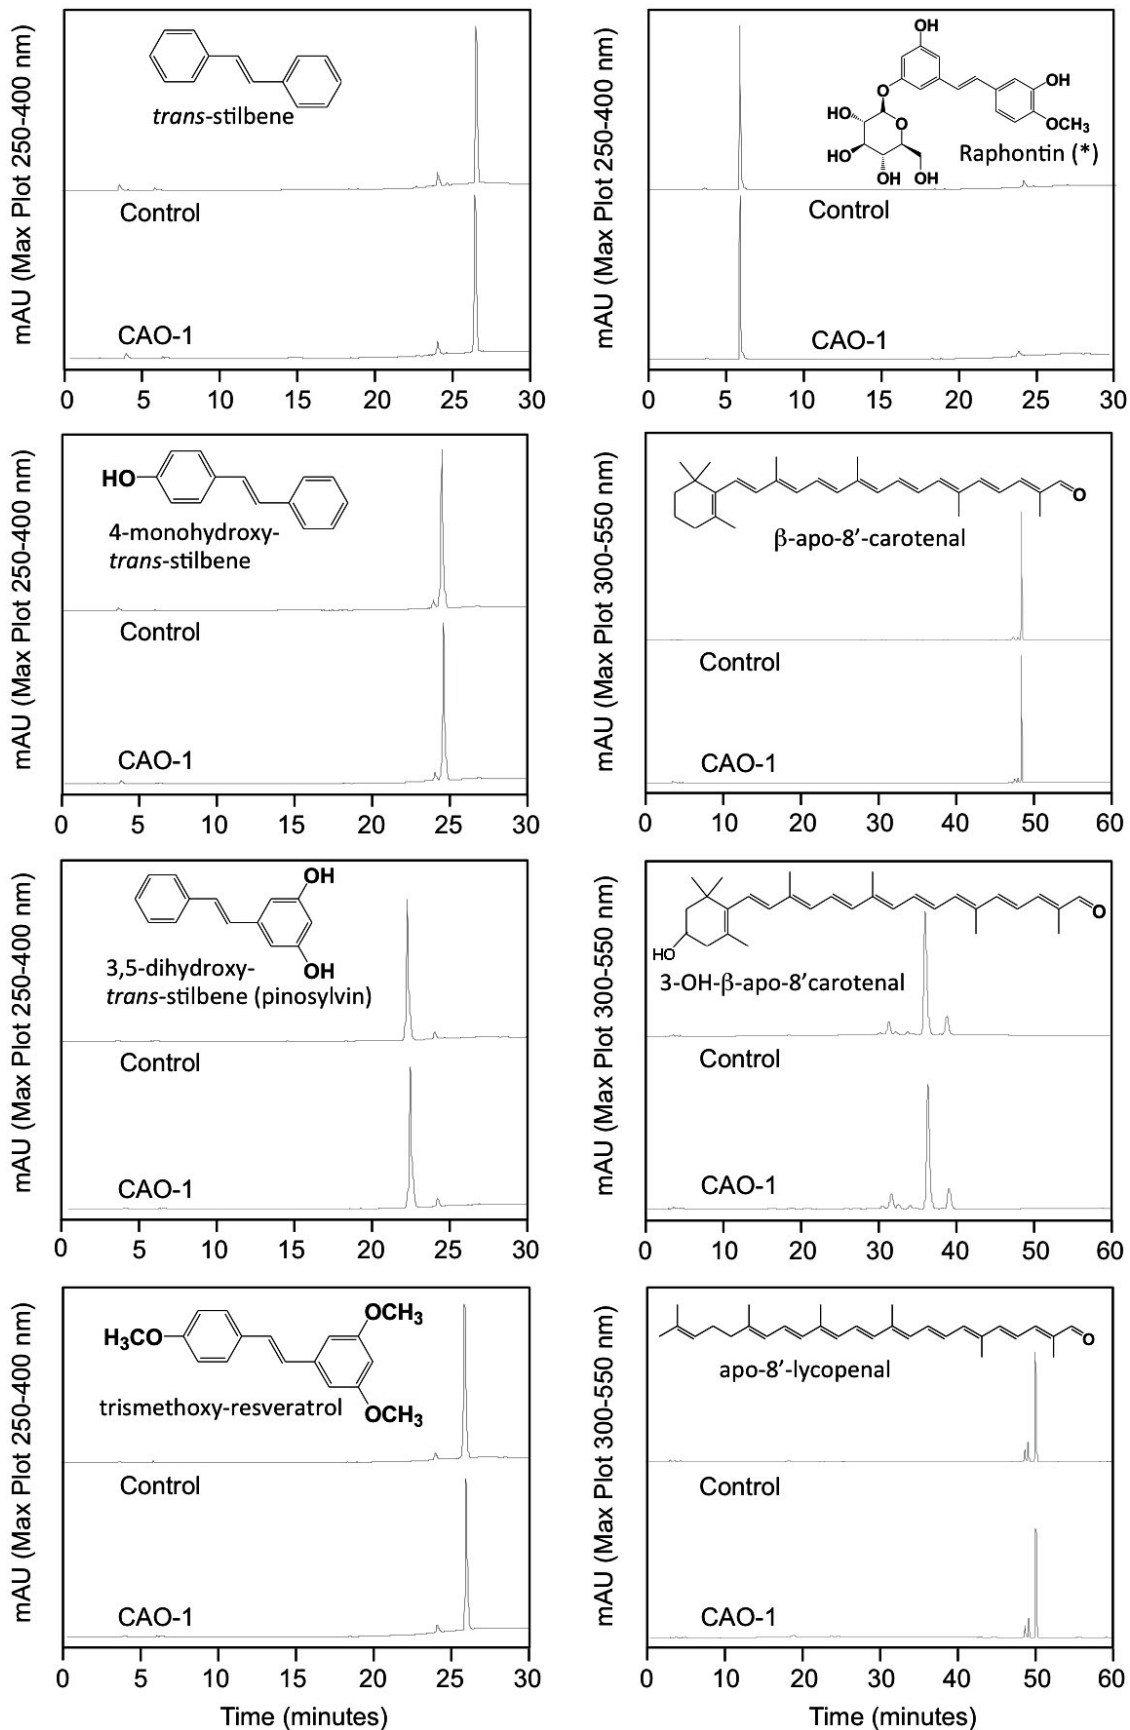

(\*) 3,3',5-trihydroxy-4'-methoxystilbene-3-O- $\beta$ -D-glucoside

**FIG S2** Lack of activity of CAO-1 with *trans*-stilbene (1), stilbene-derived compounds (2-5), and carotenals (6-8). Each graph shows the HPLC analysis of the *in vitro* assay of CAO-1 with the indicated compound and the control assay without the enzyme.

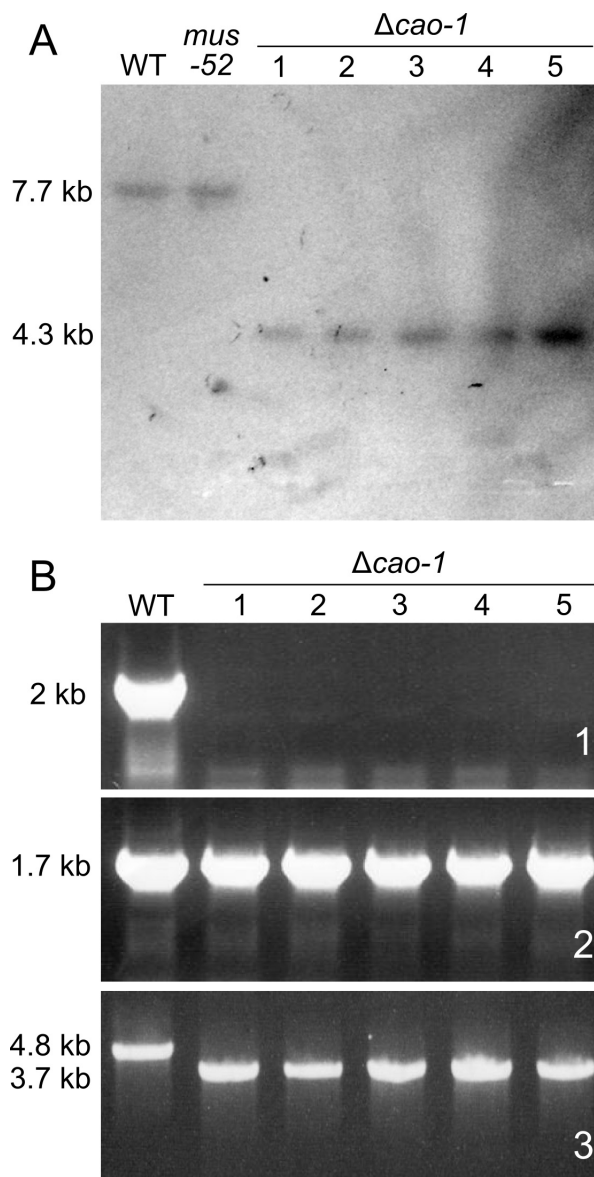

**FIG S3** Generation of  $\Delta$ *cao-1* mutants. (A) Southern blot of genomic DNA from the wild type (WT), the *mus-52* strain and five transformants digested with *Pst*I and hybridized with a *cao-1* probe not affected by the gene disruption event. The wild type 7.7 kb band is replaced by a 4.3 kb in the  $\Delta$ *cao-1* mutants. (B) PCR analyses of the wild type and the five transformants. Panel 1: lack of PCR amplification of a 2 Kb *cao-1* DNA sequence in the  $\Delta$ *cao-1* mutants. Panel 2: positive control of an internal *al-1* segment amplified from the same genomic DNA samples (1.7 kb band). Panel 3: demonstration of the replacement of the *cao-1* ORF by the *hygR* cassette in the transformants (4.8 Kb band: wild type *cao-1* allele; 3.7 Kb band:  $\Delta$ *cao-1* mutant allele).

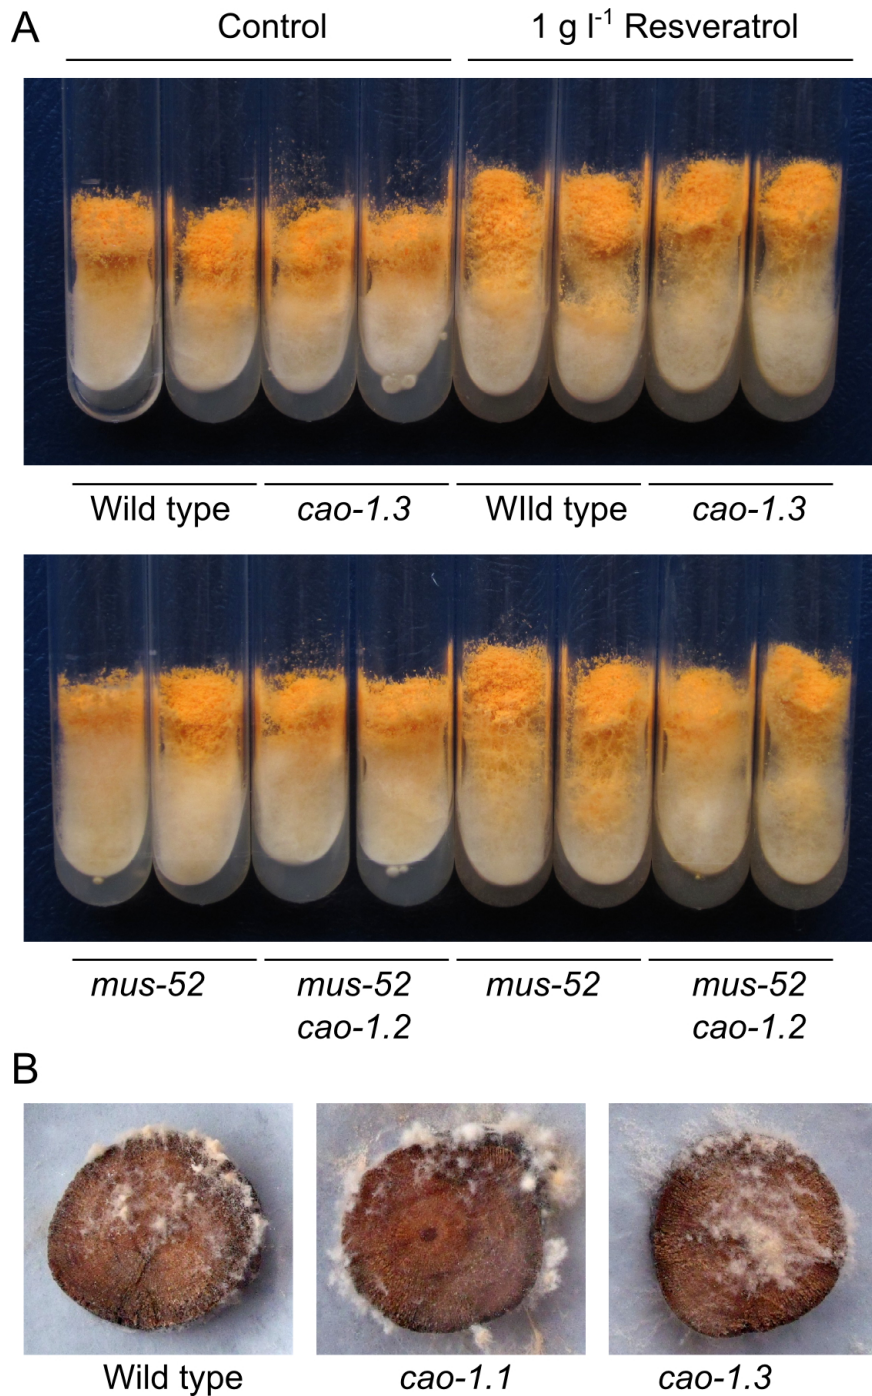

**FIG S4** Phenotype of  $\Delta cao-1$  mutants. (A) Slant cultures of two  $\Delta cao-1$  mutants and their respective control strains grown in Vogels's medium for 2 days at 30°C under light and 5 days at 22°C, with or without 1 g l<sup>-1</sup> resveratrol. (B) Growth of the wild type and two  $\Delta cao-1$  mutants on wood slices of *Platanus hispanica*. The slices were incubated for 7 days under indirect illumination.

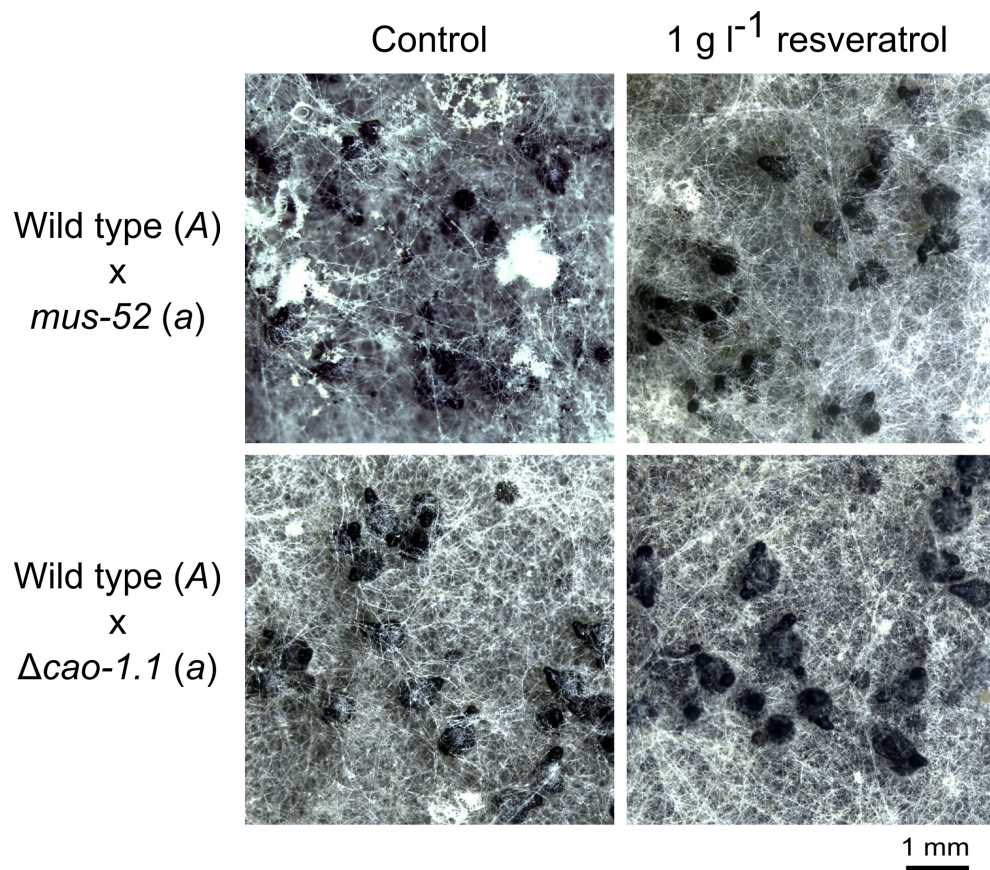

**FIG S5** Lack of effect of resveratrol on sexual crossing in a  $\Delta$ *cao-1* mutant and two control strains of *Neurospora*. The strains of opposite mating type (indicated in parentheses) were grown on synthetic crossing media at 25°C for three weeks. Mature perithecia were observed in all plates. Pictures were taken under a stereoscopic microscope.

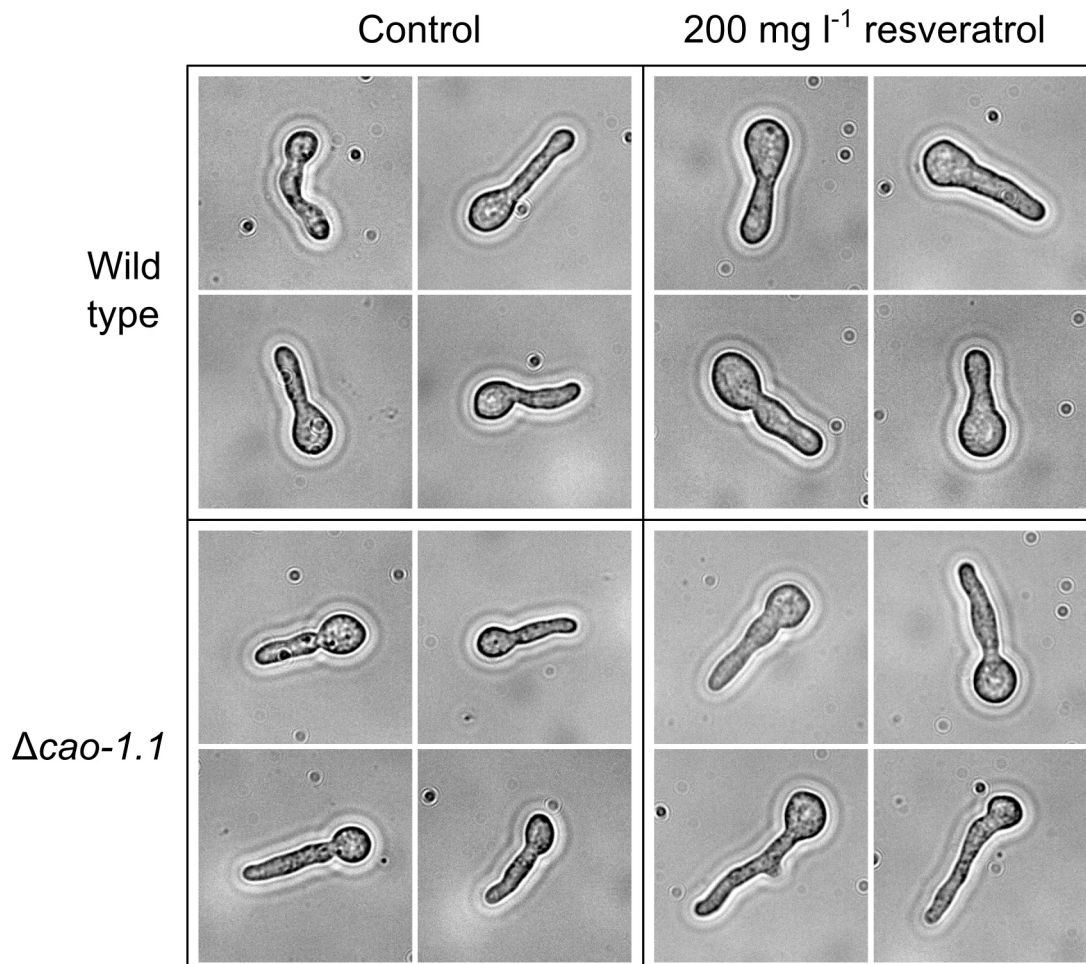

**FIG S6** Effect of resveratrol on germination of conidia from the wild type and a  $\Delta cao-1$  mutant. The conidia were incubated for 8 h in Vogel's media with or without 200 mg l<sup>-1</sup> resveratrol (0.2% ethanol present in resveratrol and control samples).

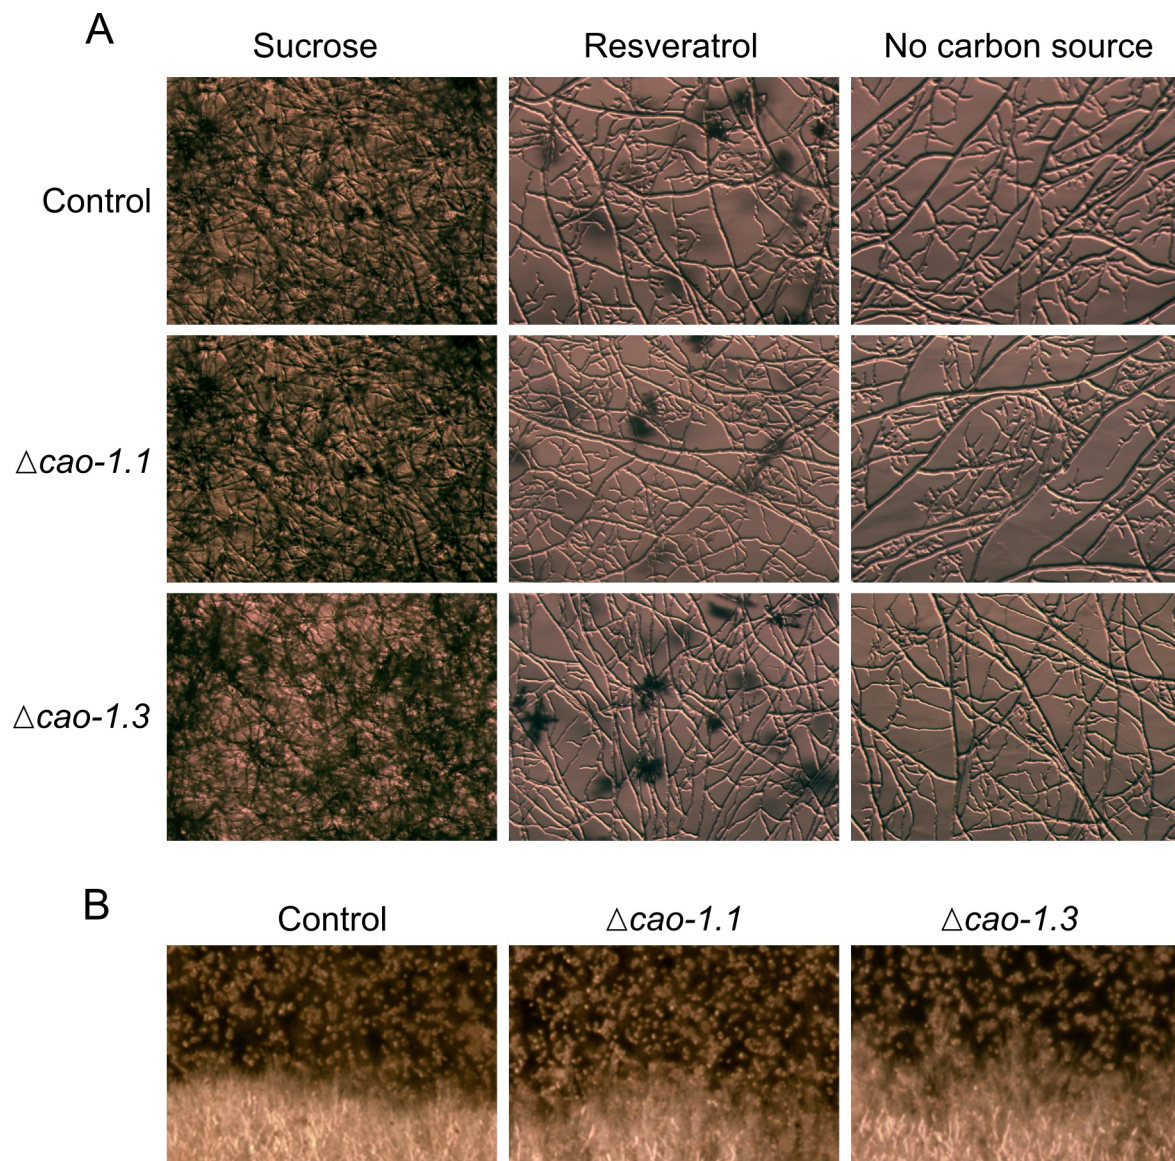

**FIG S7** Lack of use of resveratrol as carbon source in *Neurospora*. (A) Mycelia of the wild type and two  $\Delta cao-1$  mutants grown in Vogel's media with no carbon source or with 1 g l<sup>-1</sup> of either sucrose or resveratrol. (B) Aspect of the borders from colonies of the same strains grown in sorbose-containing agar for 24h (Fig. 5). The pictures were taken under a stereoscopic microscope.

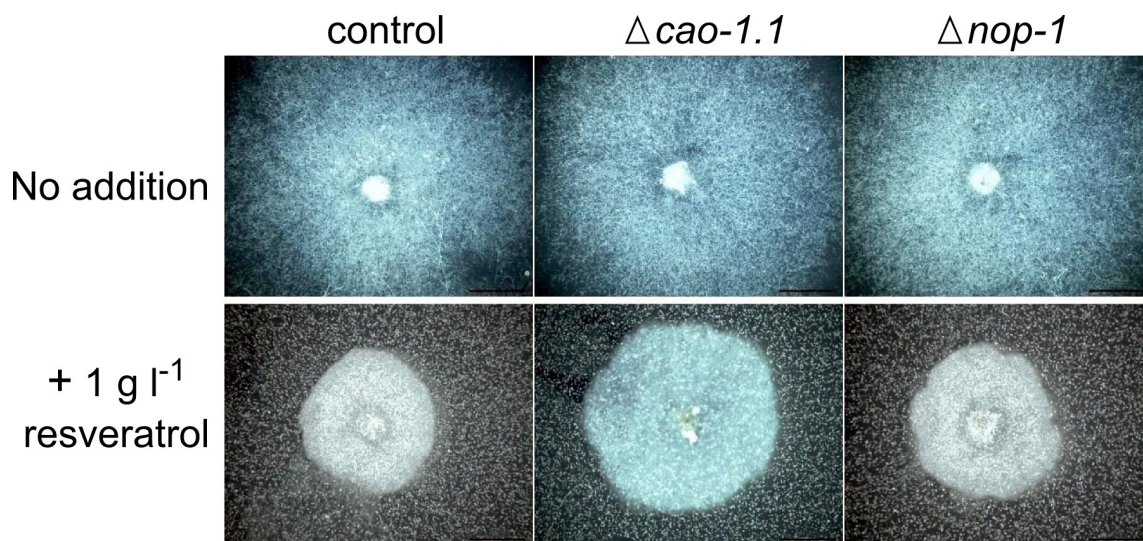

**FIG S8** Effect of resveratrol on growth of wild type,  $\Delta cao-1$  and  $\Delta nop-1$  mutants of *Neurospora*. The strains were incubated on low-stringency sorbose-containing agar for 24h. The pictures were taken under a stereoscopic microscope.
